# Supplementary material for: Spontaneous DNA Synapsis by Forming Noncanonical Intermolecular Structures
Source: MDPI journal article supplement (doi:10.3390/polym14102118), 2022-05-23
Supplement: s1 [file s1]

# Spontaneous DNA Synapsis by Forming Noncanonical Intermolecular Structures

Viacheslav Severov <sup>1,\*†</sup>, Vladimir Tsvetkov <sup>1,2,3,\*†</sup>, Nikolay Barinov <sup>1</sup>, Vladislav Babenko <sup>1</sup>, Dmitry Klinov <sup>1,4</sup> and Galina Pozmogova <sup>1</sup>

<sup>1</sup> Federal Research and Clinical Center of Physical-Chemical Medicine, Malaya Pirogovskaya Str. 1a, Moscow 119435, Russia; nik\_mipt@mail.ru (N.B.); daniorerio34@gmail.com (V.B.); klinov.dmitry@mail.ru (D.K.); pozmge@gmail.com (G.P.)

<sup>2</sup> Institute of Biodesign and Complex System Modeling, I.M. Sechenov First Moscow State Medical University, Trubetskaya Str. 8-2, Moscow 119991, Russia

<sup>3</sup> A.V. Topchiev Institute of Petrochemical Synthesis, Leninsky prospect Str. 29, Moscow 119991, Russia

<sup>4</sup> Peoples' Friendship University of Russia (RUDN University), 6 Miklukho-Maklaya str.6, 117198 Russian Federation

\* Correspondence: wws83@yandex.ru (V.S.); v.b.tsvetkov@gmail.com (V.T.)

† These authors contributed equally to this work.

**Table S1.** Sequences of natural and model DNA-duplexes used in AFM experiments. Yellow highlighted are PQSs and their complimentary C-rich chains.

|      |                                                                                                      |                                                                                                       |
|------|------------------------------------------------------------------------------------------------------|-------------------------------------------------------------------------------------------------------|
| cMyc | 5'AATGGTAGGCGCGCGTAGTTAATTCATGCGGCTCTCTTACTCTGTTTACATCCTAGAGCTAGAGTGCTCGGCTGCCCGGCTGAGTCTCCTCCCCA    | C                                                                                                     |
|      | CTTCCCCACCCTCCCCACCCTCCCCA                                                                           | TAAGCGCCCCCTCCCGGGTTCCCAAAGCAGAGGGCGTGGGGGAAAAGAAAAAAGATCCTCTCTCGCTAATC<br>TCCGCCAC                   |
| kRas | 5'CGCAGAGGGCAGAGCTATCGATGCGTTCCGCGCTCGATTCTTCTTCAGACGGGCGTACGAGAGGGAGCGGCTG                          | AGGGCGGTGTGGGAAGAGGGA                                                                                 |
|      | AGAGGGGGAGG                                                                                          | CAGCGAGCGCCGGCGGGGAGAAGGAGGGGGCCGGGCCGGCGGGGAGGAGCGGGGGCCGGGCCGGCGGAGGAAGG<br>GGTGGCTGGGGCGGTCTAGGGTG |
| NG   | 3'GCGTCTCCCGTCTCGATAGCTACGCAAGGCGCGAGCTAAGAAGAAGTCTGCCCCGATGCTCTCCCTCGCCGACTCCCGCCACACCCTTCTCCCTTC   |                                                                                                       |
|      | TCCCCCTCCGTCGCTCGCGGCCGCCCTCTTCCTCCCCCGCCCCGGCCCGCCCCCTCTCGCCCCCGCCCCGGCCGCTCCTTCCCCACCGAC           | CCCGCCAGATCCCA                                                                                        |
| 0Myc | 5'CAGTTTTAGTGCCGATTTTCGTTACTTTTTTATTGGCATGGGGTATCGGGTGTGTGATTGGGTCGGAATTTGAGATTTTTGAATTTACGCGTTAGAA  |                                                                                                       |
|      | TAGGGTGGGTGGGTGGGAATTTTCTATTTTTTAAAAAGCTCCGTTTTCTTGAAAGCATTGAAATCGGCGCGTGGTGTCTATGCAACCGGCAG         | ATGA                                                                                                  |
| 0    | 3'GTCAAAATCACGGCTAAAAGCAATGAAAAAATAACCGTACCCCATAGCCACACAATAAACCAGCCTTAAACTCTAAAACTTAAATGCGCA         |                                                                                                       |
|      | ATCTTATCCCACCCAACCCACCCCTTAAAAGATAAAAAATTTTTCGAGGCAAAAGAACCTTTCGTAACTTTAGCCGCGCACCACAAAGATACGTT      | GGCCGTCTACT                                                                                           |
|      | 5'CACGGAAGTAATACTCCTCTCCTCTTCTTTGATCAGAATCGATGCATTTTTTGTGCATGACCGCATTTCCAATAATAAAAGGGGAAAGAGGACCTG   |                                                                                                       |
|      | GAAAGGAATTAACGTCCGTTTGTCCGGGGAGGAAAGAGTTAACGGTTTTTTTACAAGGGTCTCTGCTGACTCCCCCGGCTCGGTCCACAAGCT        | CTCCACTT                                                                                              |
|      | 3'GTGCCTTCATTATGAGGAGAGGAGAAGAACTAGTCTTAGCTACGTAAAAAACACGTAAGGCGTAAAGGTTATTATTTCCCTTTCTCCTGGAC       |                                                                                                       |
|      | CTTTCCTTAATTTGCAGGCCAAACAGGCCCTCCTTTCTCAATTGCCAAAAAAGTGTTCCAGAGACGACTGAGGGGGCCGAGCCAGGTGTTCA         | GAGTGAA                                                                                               |
|      | 5'GTAGTGAGACTCCTGAAAGAAGTATCTGACCAACTTACAGATAATATTAAAGCTCTACACGAGACCTCCAATGTGATCAGCTGCACGTATCTGAC    |                                                                                                       |
|      | CAACTTACAGATAAGCCAAGTGTGATCAGCTGCACGTCATGTTCTGACTTTAGAC-                                             |                                                                                                       |
|      | GTATCTGACCAACTTACAGATAAGGAATCCATCTAGACTCAGCG                                                         |                                                                                                       |
|      | 3'CATCACTCTGAGGACTTTCTTCATAGACTGGTTGAATGTCTATTATAATTTTCGAGATGTGCTCTGGAGGTTACACTAGTCGACGTGCATAGACTGGT |                                                                                                       |
|      | TGAATGTCTATTCGGTTCACACTAGTCGACGTGCAGTACAAGGACTGAAATCTGCATAGACTGGTTGAATGTCTATTCCTTAGGTAGATCTGAGTCG    | C                                                                                                     |

|     |                                                                                                                                                                                                                                                                                                                                                                                                                              |
|-----|------------------------------------------------------------------------------------------------------------------------------------------------------------------------------------------------------------------------------------------------------------------------------------------------------------------------------------------------------------------------------------------------------------------------------|
| 2 m | 5'GTAGTGAGACTCCTGAAAGAAGTATCTGACCAACTTACAGATAATATTAAGCTCTACACGAGACCTCCAATGTGATCAGCTGCACGTATCTGAC<br>CCACCCACAGATAAGCCAAGTGTGATCAGCTGCACGTCATGTTCTGACTTTAGAC-<br>GTATCTGACCAACTTACAGATAAGGAATCCATCTAGACTCAGCG<br>3'CATCACTCTGAGGACTTTCTTCATAGACTGGTTGAATGTCTATTATAATTTGAGATGTGCTCTGGAGGTTACACTAGTCGACGTGCATAGACTGG<br>GTGGGTGTCTATTCGGTTCACACTAGTCGACGTGCAGTACAAGGACTGAAATCTGCATAGACTGGTTGAATGTCTATTCTTAGGTAGATCTGAGTC<br>GC  |
| 3 m | 5'GTAGTGAGACTCCTGAAAGAAGTATCTGACCAACTTACAGATAATATTAAGCTCTACACGAGACCTCCAATGTGATCAGCTGCACGTATCTGAC<br>CCACCCACCCATAAGCCAAGTGTGATCAGCTGCACGTCATGTTCTGACTTTAGAC-<br>GTATCTGACCAACTTACAGATAAGGAATCCATCTAGACTCAGCG<br>3'CATCACTCTGAGGACTTTCTTCATAGACTGGTTGAATGTCTATTATAATTTGAGATGTGCTCTGGAGGTTACACTAGTCGACGTGCATAGACTGG<br>GTGGGTGGGTATTCGGTTCACACTAGTCGACGTGCAGTACAAGGACTGAAATCTGCATAGACTGGTTGAATGTCTATTCTTAGGTAGATCTGAGTC<br>GC  |
| 4 m | 5'GTAGTGAGACTCCTGAAAGAAGTATCTGACCAACTTACAGATAATATTAAGCTCTACACGAGACCTCCAATGTGATCAGCTGCACGTATCCCAC<br>CCACCCACCCATAAGCCAAGTGTGATCAGCTGCACGTCATGTTCTGACTTTAGAC-<br>GTATCTGACCAACTTACAGATAAGGAATCCATCTAGACTCAGCG<br>3'CATCACTCTGAGGACTTTCTTCATAGACTGGTTGAATGTCTATTATAATTTGAGATGTGCTCTGGAGGTTACACTAGTCGACGTGCATAGGGTGG<br>GTGGGTGGGTATTCGGTTCACACTAGTCGACGTGCAGTACAAGGACTGAAATCTGCATAGACTGGTTGAATGTCTATTCTTAGGTAGATCTGAGTC<br>GC  |
| 5 m | 5'GTAGTGAGACTCCTGAAAGAAGTATCTGACCAACTTACAGATAATATTAAGCTCTACACGAGACCTCCAATGTGATCAGCTGCACGTCCCACCC<br>ACCCACCCACCCAAGCCAAGTGTGATCAGCTGCACGTCATGTTCTGACTTTAGAC-<br>GTATCTGACCAACTTACAGATAAGGAATCCATCTAGACTCAGCG<br>3'CATCACTCTGAGGACTTTCTTCATAGACTGGTTGAATGTCTATTATAATTTGAGATGTGCTCTGGAGGTTACACTAGTCGACGTGCAGGGTGGGT<br>GGGTGGGTGGGTTCGGTTCACACTAGTCGACGTGCAGTACAAGGACTGAAATCTGCATAGACTGGTTGAATGTCTATTCTTAGGTAGATCTGAGTC<br>GC  |
| 6 m | 5'GTAGTGAGACTCCTGAAAGAAGTATCTGACCAACTTACAGATAATATTAAGCTCTACACGAGACCTCCAATGTGATCAGCTGCACCCACCCAC<br>CCACCCACCCACCCGCCAAGTGTGATCAGCTGCACGTCATGTTCTGACTTTAGAC-<br>GTATCTGACCAACTTACAGATAAGGAATCCATCTAGACTCAGCG<br>3'CATCACTCTGAGGACTTTCTTCATAGACTGGTTGAATGTCTATTATAATTTGAGATGTGCTCTGGAGGTTACACTAGTCGACGTGGGGTGGGTGG<br>GTGGGTGGGTGGGCGGTTTCACACTAGTCGACGTGCAGTACAAGGACTGAAATCTGCATAGACTGGTTGAATGTCTATTCTTAGGTAGATCTGAGT<br>CGC  |
| 5 s | 5'GTAGTGAGACTCCTGAAAGAAGTCCCACCCACCCACCCACCAATATTAAGCTCTACACGAGACCTCCAATGTGATCAGCTGCACGTATCTGAC<br>CAACTTACAGATAAGCCAAGTGTGATCAGCTGCACGTCATGTTCTGACTTTAGAC-<br>GTATCTGACCAACTTACAGATAAGGAATCCATCTAGACTCAGCG<br>3'CATCACTCTGAGGACTTTCTTCAGGGTGGGTGGGTGGGTGGGTGTTATAATTTGAGATGTGCTCTGGAGGTTACACTAGTCGACGTGCATAGACTGG<br>TTGAATGTCTATTCGGTTCACACTAGTCGACGTGCAGTACAAGGACTGAAATCTGCATAGACTGGTTGAATGTCTATTCTTAGGTAGATCTGAGTC<br>GC |

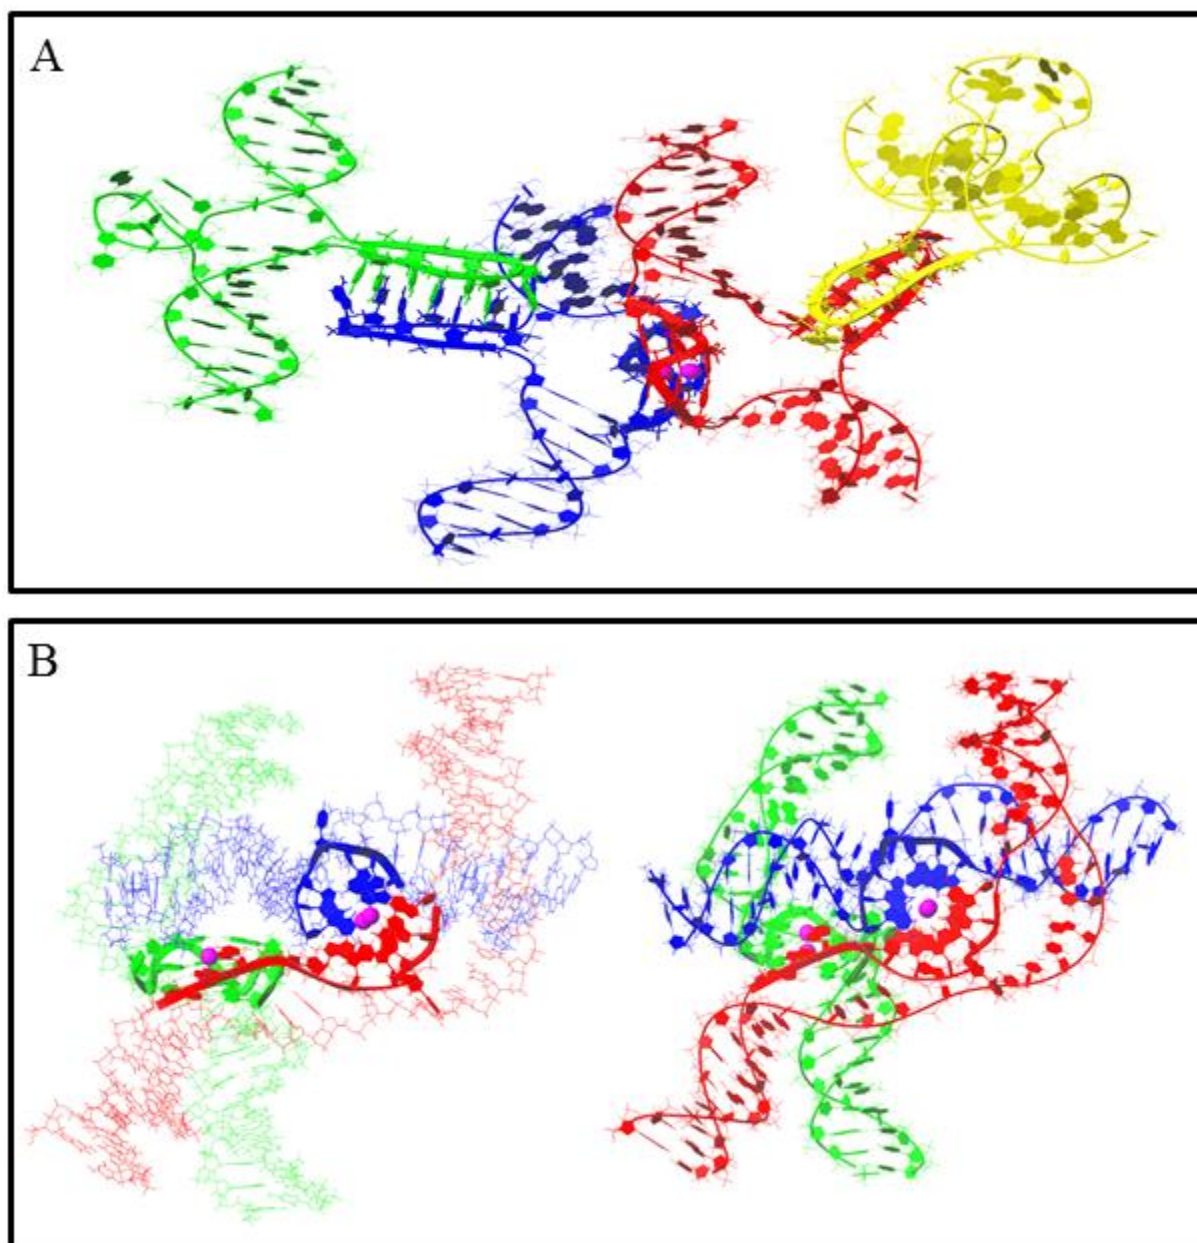

**Figure S1.** Examples of di- and trimeric G4/IM-synaptic complexes, formed by 4m sample, with the same structures as 2m and 3m form. Scale bars: 50 nm.

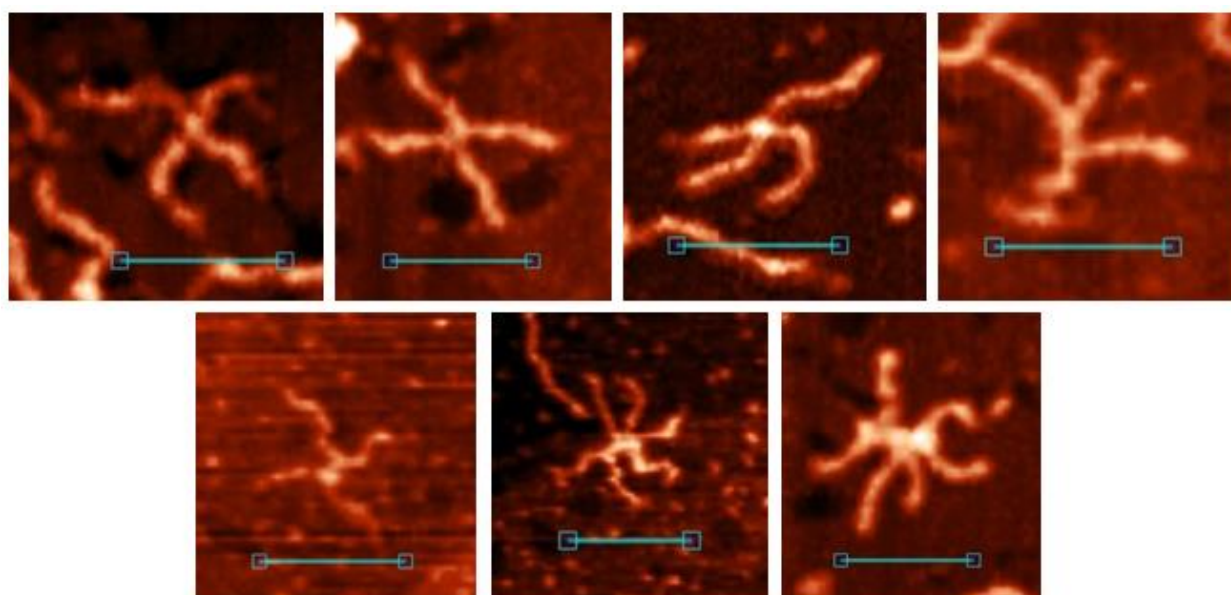

**Figure S2.** Examples of di- and trimeric G4/IM-synaptic complexes, formed by 4m sample, with the same structures as 2m and 3m form. Scale bars: 50 nm.

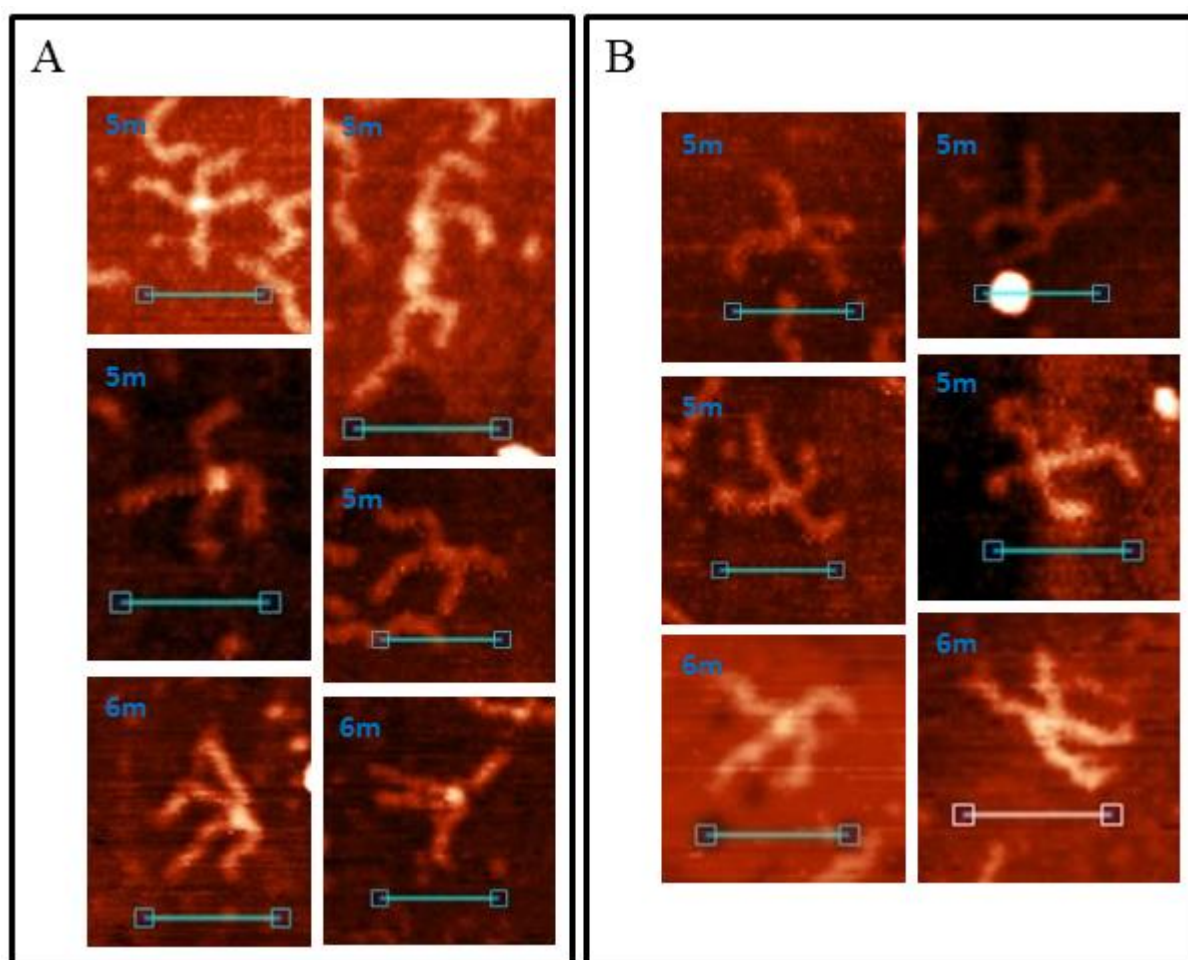

**Figure S3.** Examples of simple cruciform synaptic complexes, formed by 5m and 6m samples. (A) Complexes with four G<sub>3</sub>T and/or C<sub>3</sub>A blocks involved. They have the same structures as the complexes formed by 4m sample. (B) Complexes with only two G<sub>3</sub>T and/or C<sub>3</sub>A blocks involved. They have the same structures as formed by 2m and 3m samples. Scale bars: 50 nm.



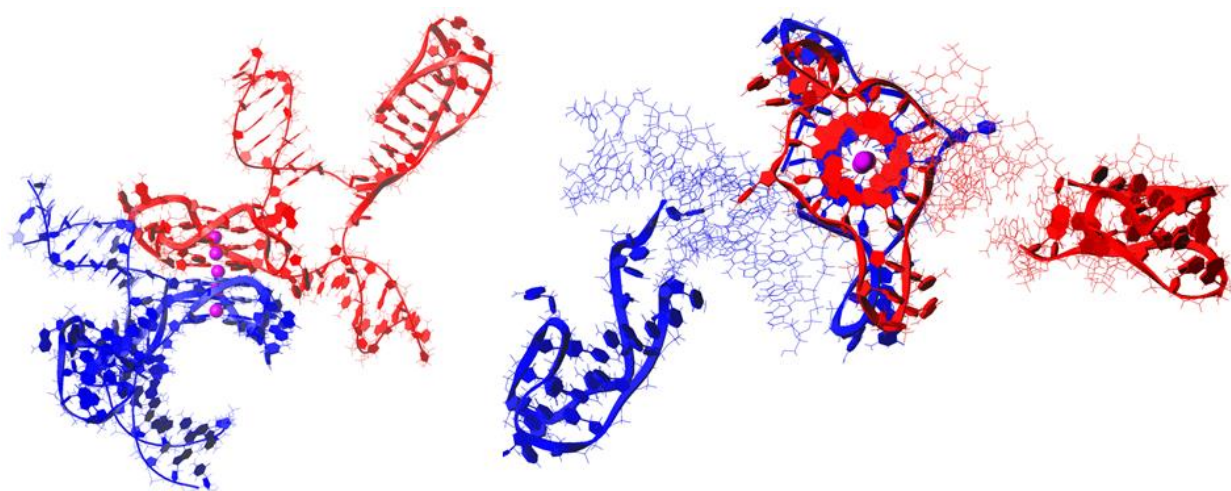

**Figure S4.** Molecular model of the possible complex, formed by 6m sample through stacking of intramolecular G4s and containing two 5-base loops at each chain (not revealed by AFM).

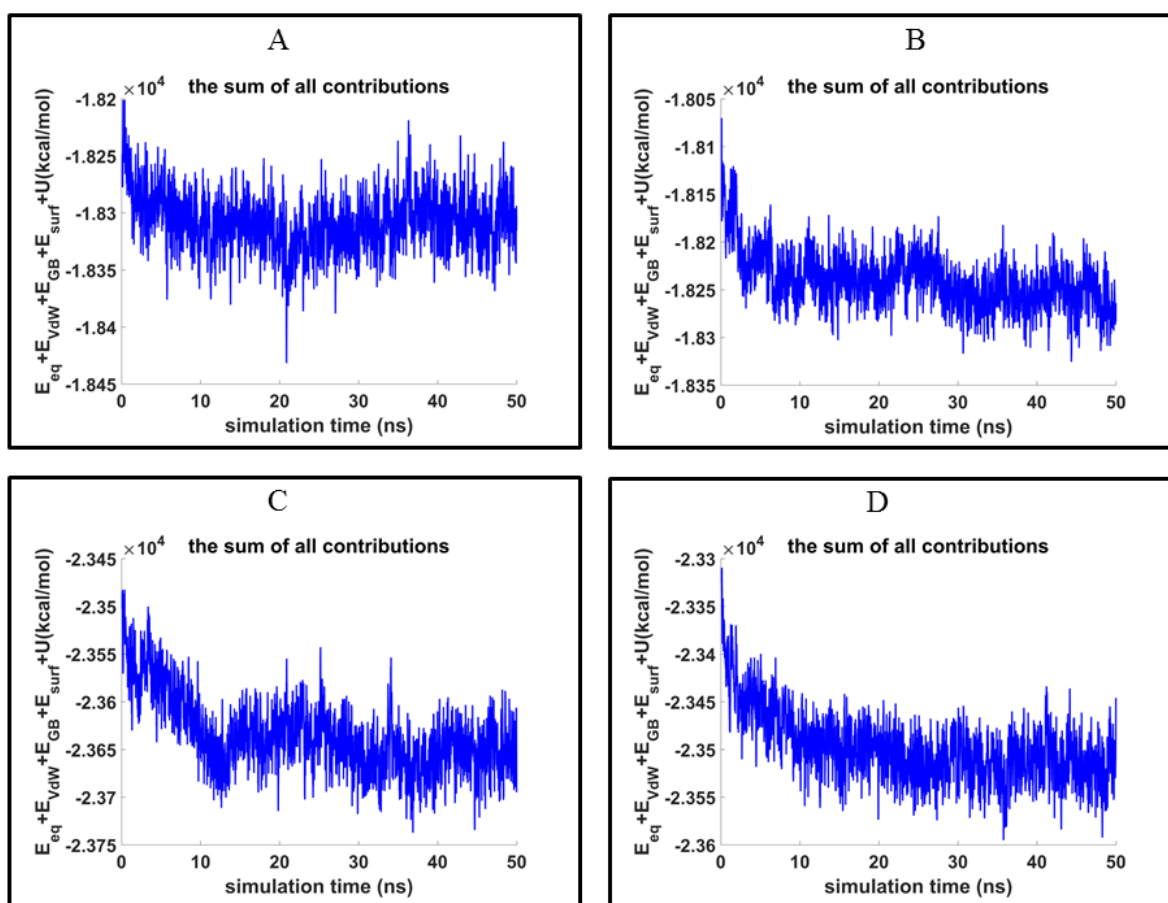

**Figure S5.** Evolution of the contributions to the free energy of the DNA. The plots were smoothed using the moving average method (span = 5). (A) In structure, shown in Fig. 3A. (B) In structure, shown in Fig. 3C. (C) In structure, shown in Fig. 5A. (D) In structure, shown in Fig. 5E.  $E_{eq}$  – electrostatic energies,  $E_{vdw}$  – Van der Waals energies,  $E_{GB}$  – polar and  $E_{surf}$  – non-polar contributions to the solvation energy,  $U$  – deformation energy of valence bonds, valence and dihedral angles.

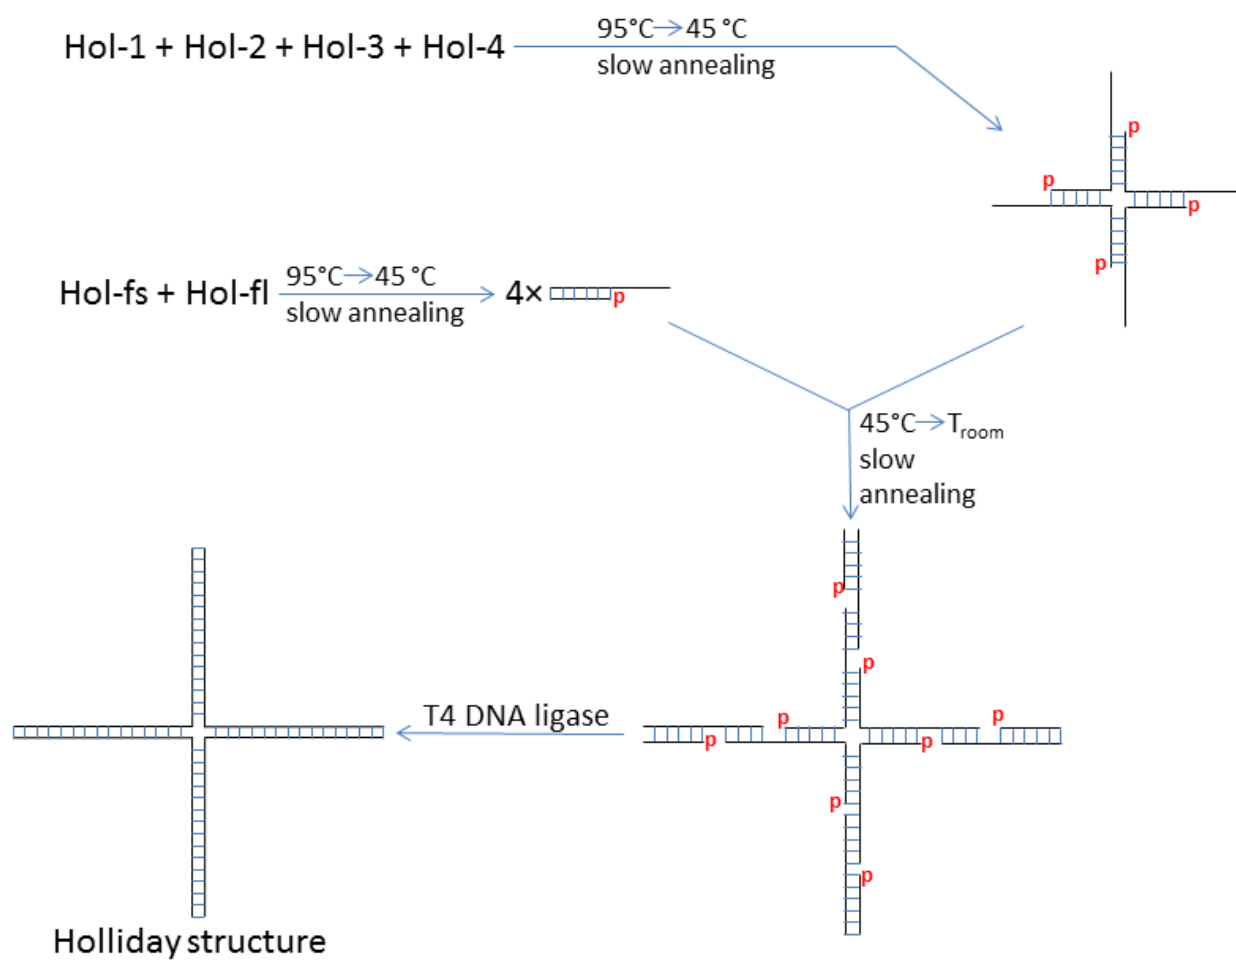

**Figure S6.** Scheme of immobile Holliday structure synthesis.

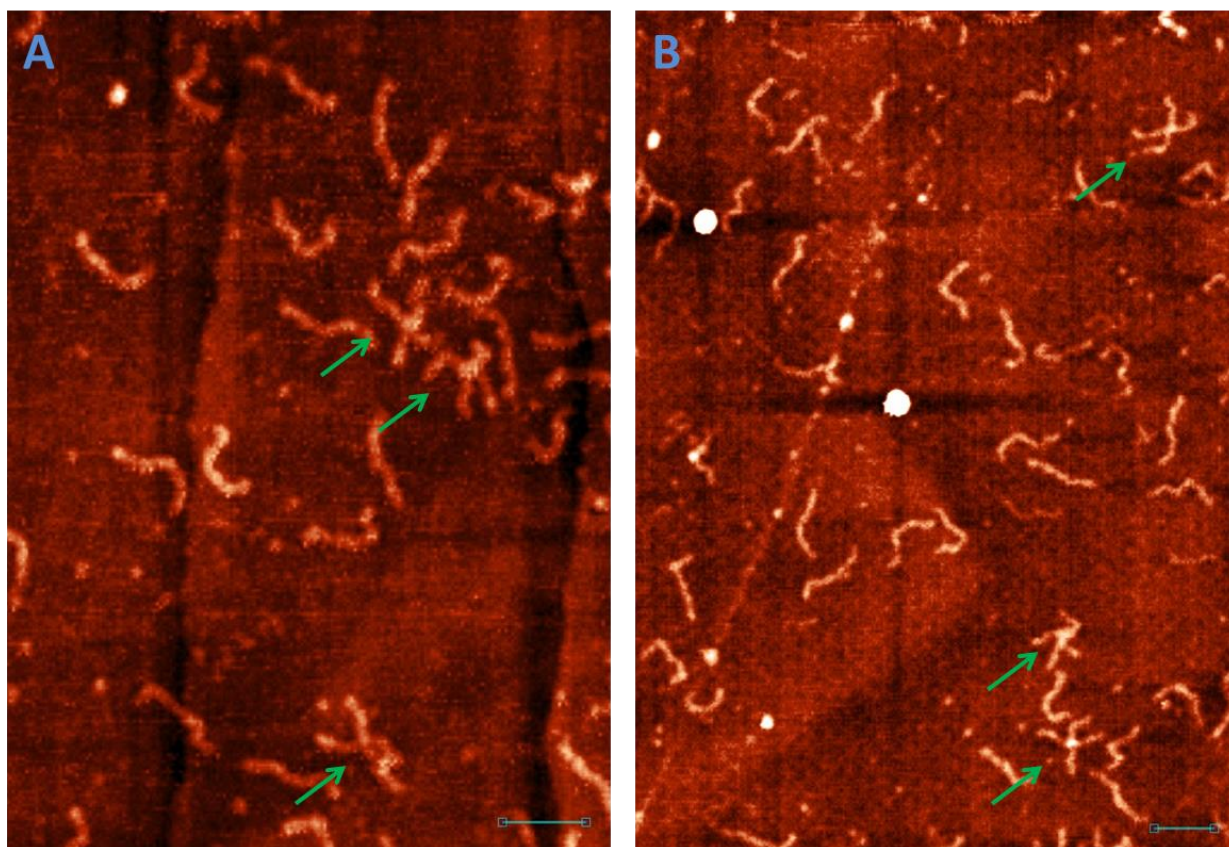

**Figure S7.** AFM images of 5m sample under different conditions. **(A)** AFM-buffer (10 mM KCl, 10 mM Tris-HCl, pH 5.6). **(B)** AFM-buffer with addition of 10 mM MgCl<sub>2</sub>. The green arrows show the folded G4/IM-synaptic complexes. Scale bars: 50 nm.

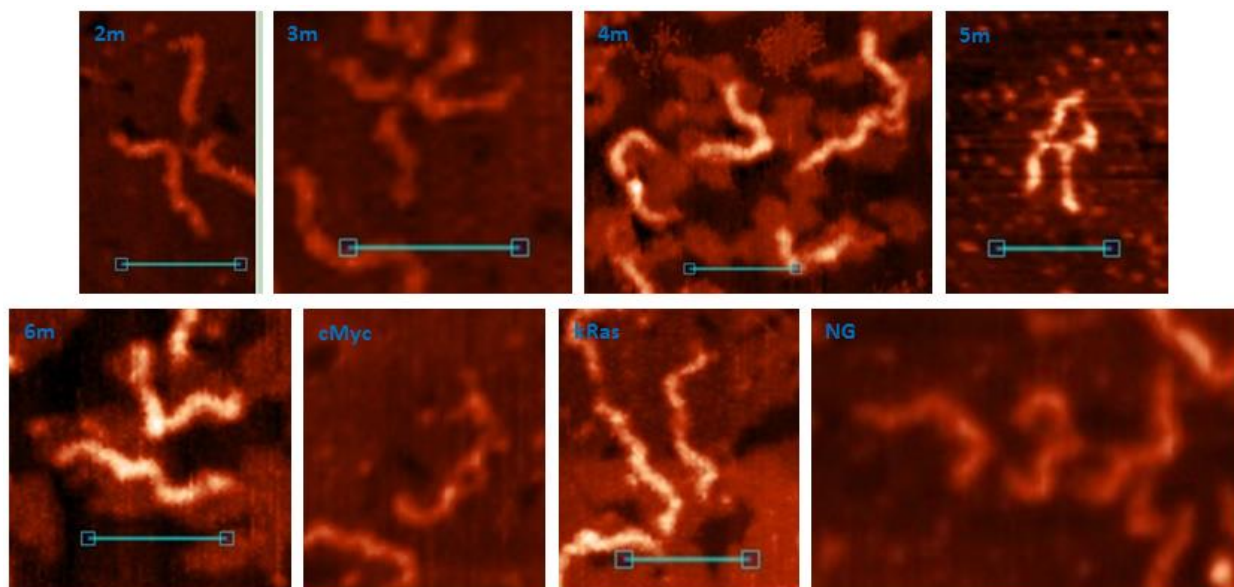

**Figure S8.** Examples of broken G4/IM-synaptic complexes.
